# Supplementary material for: A novel transgenic mouse model of growth plate dysplasia reveals that decreased chondrocyte proliferation due to chronic ER stress is a key factor in reduced bone growth
Source: PubMed Central journal article supplement (PMC3820264; doi:10.1242/dmm.013342), 2013-09-12
Supplement: supp_013342_DMM013342.pdf [file supp_013342_DMM013342.pdf]

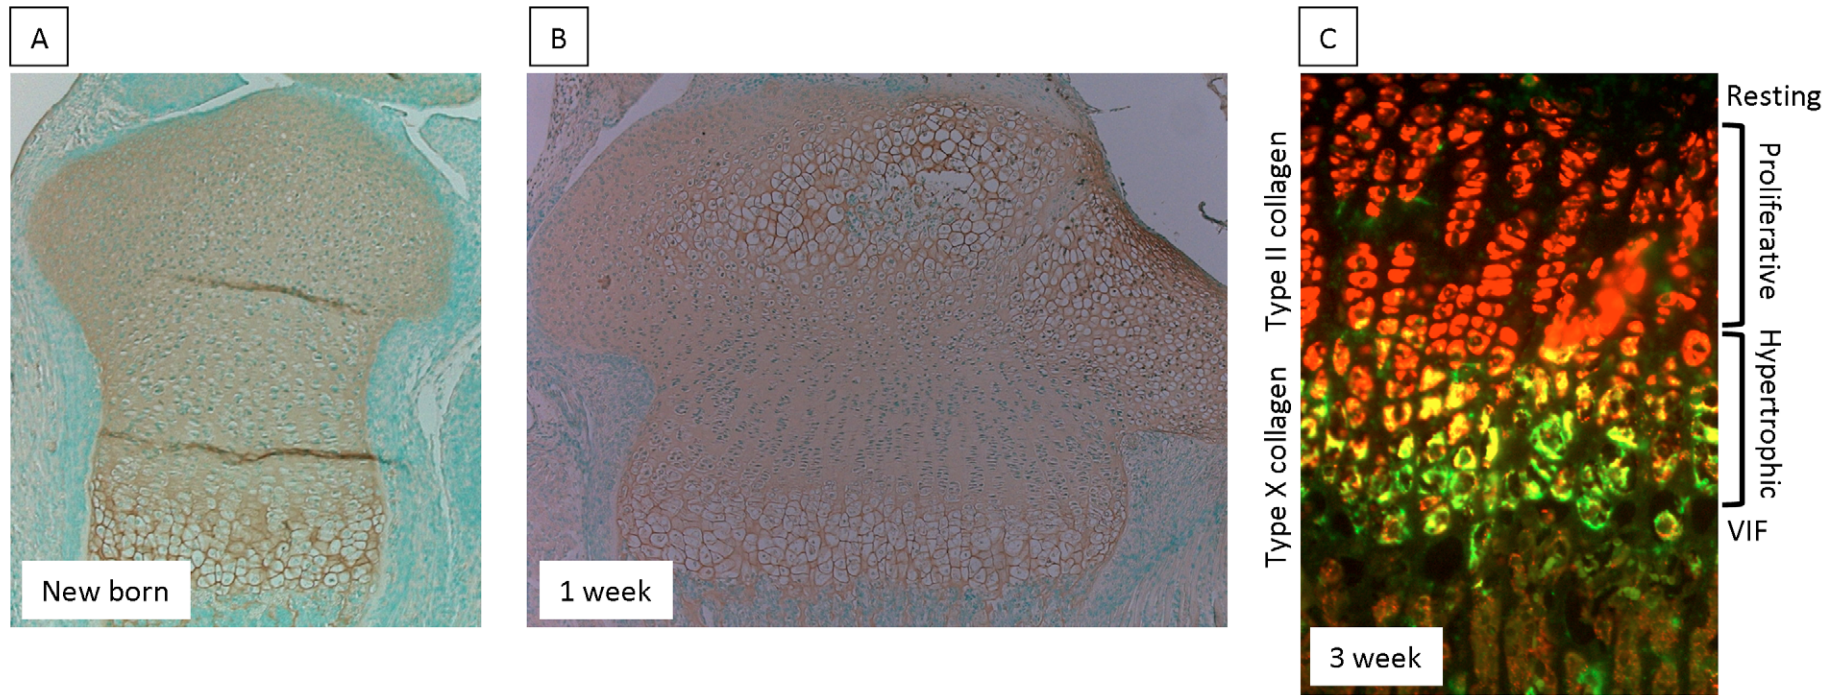

**Supplemental Figure S1. Expression of type II and type X collagen in the cartilage growth plate.** Immunohistochemistry (IHC) was used to demonstrate the expression of type II collagen at new born and at 1 week of age. *In situ* hybridization was used to demonstrate the expression of type II and type X collagens at 3 weeks of age. **A, B)** Type II collagen protein is present throughout the entire growth plate and articular cartilages (brown staining) at new born and 1 week of age. **C)** *In situ* hybridization for type II (red) and type X (green) collagen mRNA clearly shows that type II collagen is expressed predominantly in the resting and proliferative zones, whereas type X collagen expression is restricted to hypertrophic chondrocytes. Collagen II and X are both expressed in pre-hypertrophic chondrocytes (yellow), prior to the onset of hypertrophy and eventually apoptosis at the vascular invasion front (VIF).

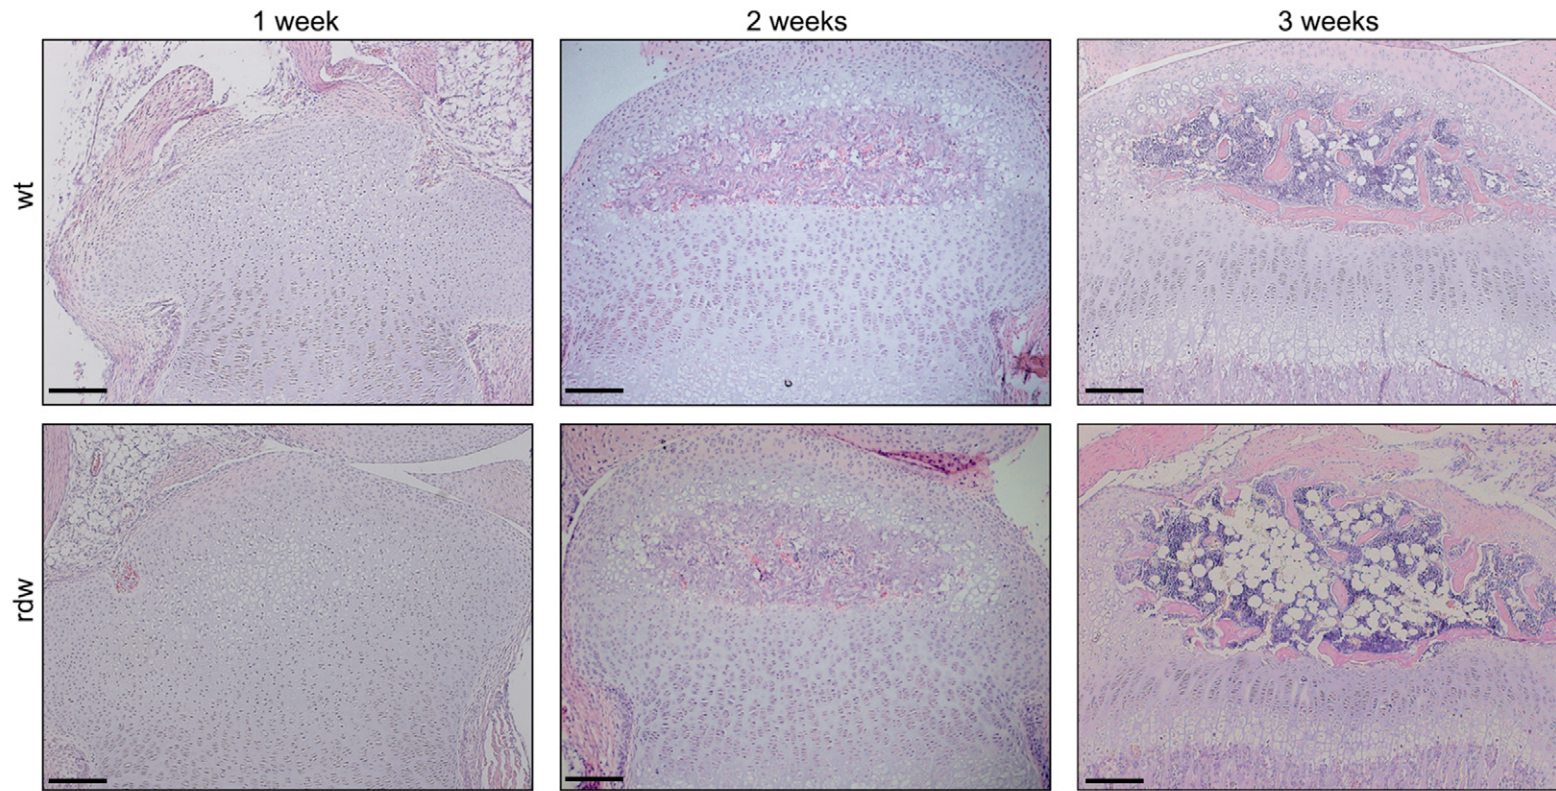

**Supplemental Figure S2. Overall development of the growth plate and secondary centre of ossification is normal.**

H & E staining showing the development of the growth plate and formation of the secondary centre of ossification from 1 to 3 weeks of age. Wild-type (wt) and *Col2-Tg<sup>rdw</sup>* (rdw) growth plates are comparable with clearly distinguishable resting, proliferating and hypertrophic zones. Black scale bars = 100  $\mu$ m.



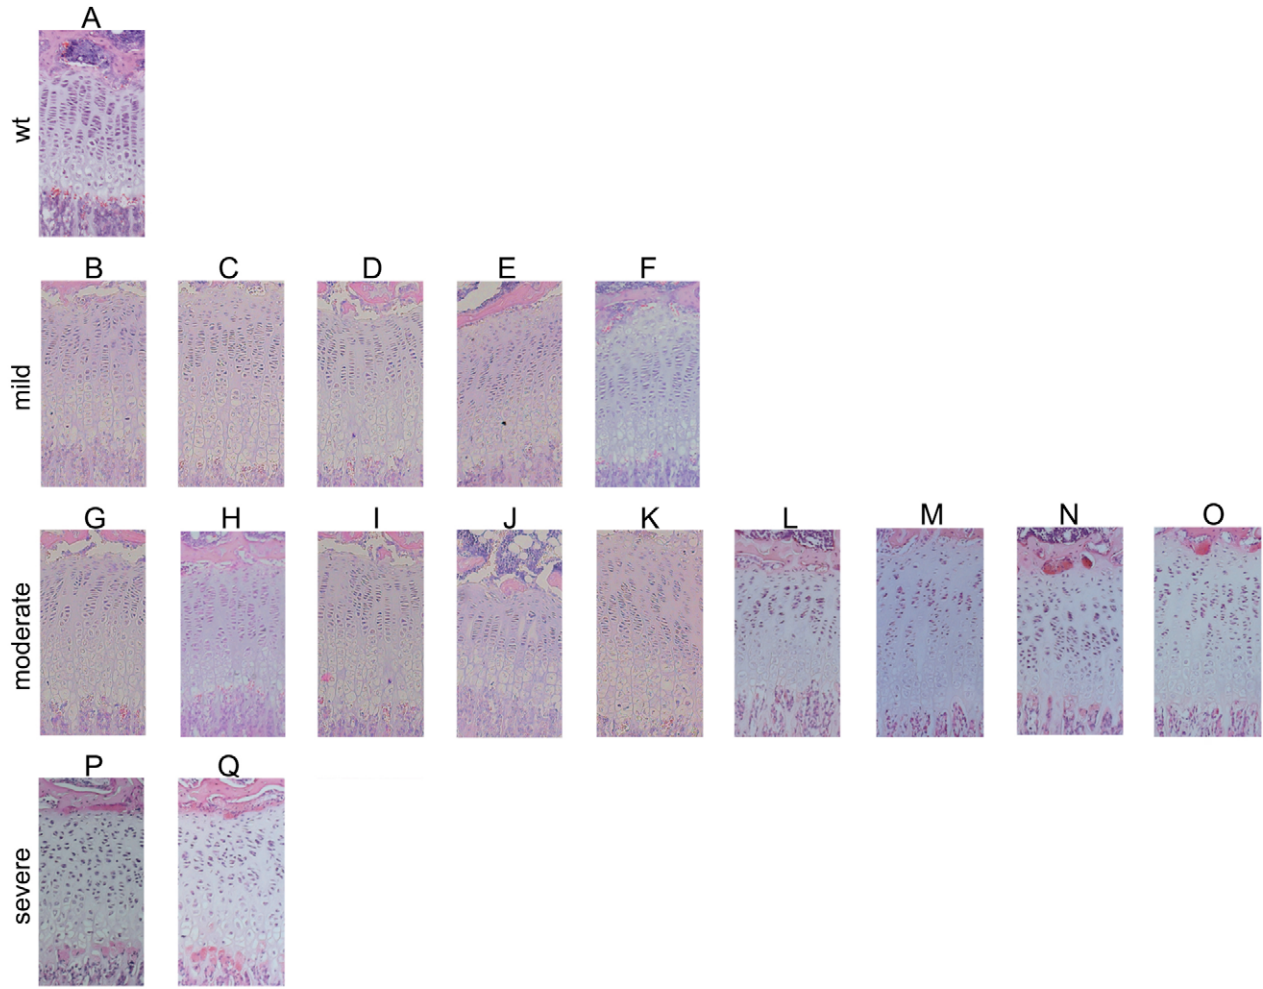

**Supplemental Figure S3. Variable disorganisation of the growth plate in rdw mutant mice.**

H & E staining demonstrating disorganisation of the proliferative zone in a proportion of *Col2-Tg* mutant mice compared to wild type (A). The disorganisation varied from mild (B to F), moderate (G to O) to severe (P & Q) and is characterised by the misalignment of chondrocytes within individual chondrons and a further disorganisation of chondrons within vertical stacks. In the milder cases, columnar alignment of chondrocytes is preserved, but larger areas of hypocellularity are observed. In severe cases, columnar alignment is partially lost. However, no correlation was observed between the grade of growth plate abnormality and the severity of the chondrodysplastic phenotype in mice. Black scale bar = 100  $\mu$ m.

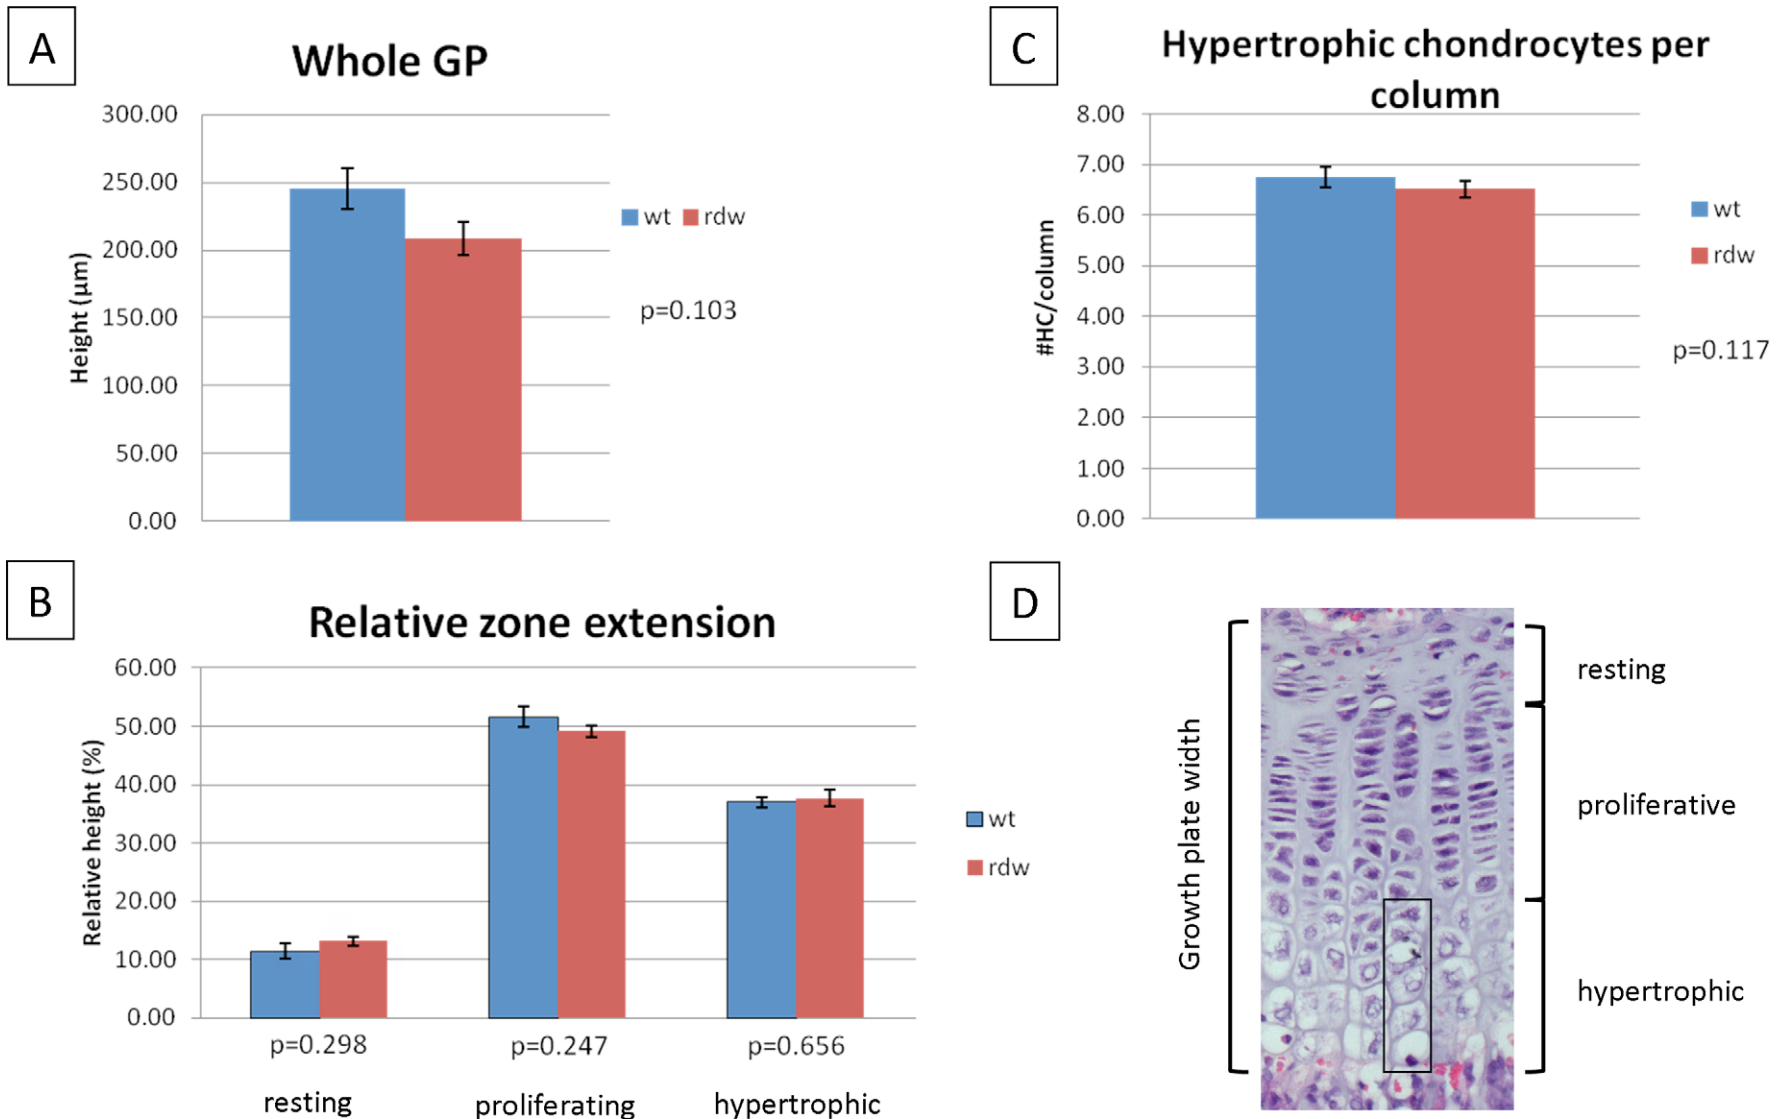

**Supplemental Figure S4. Morphometric analysis of the cartilage growth plate from wild type and *Col2-Tg<sup>rdw</sup>* mice at 3 weeks of age. A)** Height (mm) of the entire growth plate shows no differences between wild type (wt) and *Col2-Tg<sup>rdw</sup>* mice (rdw) mice. **B)** The relative proportions (%) of the individual resting, proliferative and hypertrophic zones were also comparable between wt and rdw mice. **C)** There were no differences in the number of hypertrophic chondrocytes in individual cell stacks within the hypertrophic zone. **D)** Schematic showing the various zones of the growth plate that were used for the morphometric analysis, whilst the boxed area shows a typical stack of hypertrophic cells.

| Mouse | Gene               | Mutation | Birth            | Onset               | Reduction in bone length   |                            |                            | Cell Proliferation | Apoptosis                                     | Micro array               | Proteomics    | Reference                                   |
|-------|--------------------|----------|------------------|---------------------|----------------------------|----------------------------|----------------------------|--------------------|-----------------------------------------------|---------------------------|---------------|---------------------------------------------|
|       |                    |          |                  |                     | 3 week                     | 6 week                     | 9-10 week                  | 3 week             | 3 week                                        |                           |               |                                             |
| EDM5  | <i>Matn3</i>       | V194D    | Normal           | 2 week <sup>1</sup> | ↓12% (tibia)               | 13% (tibia)                | 12% (tibia)                | ↓16%               | Spatially dysregulated                        | 5 day                     | 3 week        | Leighton 2007<br>Nundlall 2010<br>Bell 2013 |
| PSACH | <i>Comp</i>        | D469del  | Normal           | 6 week <sup>2</sup> | No difference              | ↓6% (tibia)                | ↓6% (femur)<br>↓5% (tibia) | ↓17%               | ↑90-fold (Pz)<br>↑5-fold (Hz)                 | NB<br>5 day<br>2 & 3 week | 3 week        | Suleman 2012<br>Bell 2013                   |
| EDM1  | <i>Comp</i>        | T585M    | Normal           | 9 week <sup>3</sup> | No difference              | No difference              | ↓6% (tibia)                | ↓24%               | ↑3-fold (Rz)<br>↑12-fold (Pz)<br>↑3-fold (Hz) | 5 day                     | 3 week        | Pirog-Garia 2007<br>Bell 2013               |
| RDW   | <i>Col2-TG_RDW</i> | G2320R   | Slightly smaller | Birth <sup>4</sup>  | ↓9% (femur)<br>↓8% (tibia) | ↓6% (femur)<br>↓5% (tibia) | ↓8% (femur)<br>↓5% (tibia) | ↓21%               | No difference                                 | 5 day                     | 3 week        | This study                                  |
| MCDS  | <i>Col10a1</i>     | N617K    | Normal           | 1 week <sup>5</sup> | ↓16% (femur)               | Not performed              | ↓20% (femur)               | No difference      | No difference                                 | 2 week                    | Not performed | Rajpar 2010<br>Cameron 2011                 |
| Cog   | <i>ColX-TG_Cog</i> | L2263P   | Normal           | 1 week <sup>6</sup> | ↓4% (femur)                | ↓8% (femur)                | Not performed              | No difference      | No difference                                 | 2 week                    | Not performed | Rajpar 2010<br>Cameron 2011                 |

**Table S1. Phenotypic consequences in targeted mouse models and novel phenocopies of epiphyseal and metaphyseal dysplasias.**

An overview of the phenotype and pathological features in mouse models of epiphyseal (EDM5, PSACH, EDM1, RDW) and metaphyseal (MCDS, Cog) dysplasia and for each mouse model relevant genes and mutations are indicated with the phenotype at birth and/or age of onset of symptoms (i.e. short limbs). A significant reduction in cell proliferation and changes in apoptosis are shown at 3 weeks of age. Microarray and proteomics studies were primarily performed at 5 days and 3 weeks of age respectively. Key: NB = new born; Rz = resting zone; Pz = proliferative zone; Hz = hypertrophic zone.

1. Mutant mice are normal at birth but significant reduction in length of tibia occurs by 2 weeks of age.
2. Mutant mice are normal at birth but significant reduction in length of tibia occurs by 6 weeks of age.
3. Mutant mice are normal at birth but significant reduction in length of tibia occurs by 9 weeks of age.
4. Mutant mice were slightly shorter than wild type littermates at birth and a significant reduction in the length of tibia and femur occur by 9 weeks of age.
5. Mutant mice are normal at birth but significant reduction in length of femur occurs by 2 weeks of age.
6. Mutant mice are normal at birth but significant reduction in length of femur occurs by 1 week of age and newborn mutant mice exhibited an expanded hypertrophic zone.

| Mouse Genotype              | WT       |    |    | RDW      |    |    | n.s | WT       |    |    | RDW      |    |    | n.s | WT       |    |    | RDW      |    |    | V194D     | T585M      | D469Del  |
|-----------------------------|----------|----|----|----------|----|----|-----|----------|----|----|----------|----|----|-----|----------|----|----|----------|----|----|-----------|------------|----------|
|                             | Buffer 1 |    |    | Buffer 1 |    |    |     | Buffer 2 |    |    | Buffer 2 |    |    |     | Buffer 3 |    |    | Buffer 3 |    |    |           |            |          |
|                             | 1        | 2  | 3  | 1        | 2  | 3  |     | 1        | 2  | 3  | 1        | 2  | 3  |     | 1        | 2  | 3  | 1        | 2  | 3  |           |            |          |
| $\alpha$ 1(XII) collagen    | 24       | 18 | 13 | 21       | 23 | 22 | n.s | 27       | 29 | 30 | 17       | 41 | 28 | n.s | 18       | 20 | 25 | 23       | 26 | 26 | ↓*[2]     | ↓*[2]      | n.s      |
| $\alpha$ 1(II) collagen     | 14       | 11 | 18 | 11       | 8  | 9  | ↓*  | 22       | 19 | 19 | 16       | 14 | 21 | n.s | 16       | 13 | 13 | 12       | 17 | 12 | n.s       | n.s        | n.s      |
| $\alpha$ 3(VI) collagen     | 4        | 3  | 3  | 4        | 4  | 0  | n.s | 2        | 2  | 0  | 3        | 8  | 6  | ↑*  | 35       | 26 | 38 | 30       | 35 | 39 | ↑*[3]     | n.s        | n.s      |
| $\alpha$ 2(XI) collagen     | 6        | 3  | 6  | 6        | 4  | 7  | n.s | 13       | 14 | 14 | 9        | 9  | 10 | n.s | 6        | 8  | 4  | 5        | 7  | 10 | n.s       | n.s        | n.s      |
| $\alpha$ 2(XI) collagen     | 6        | 3  | 6  | 6        | 4  | 7  | n.s | 13       | 14 | 14 | 9        | 9  | 10 | n.s | 6        | 8  | 4  | 5        | 7  | 10 | n.s       | n.s        | n.s      |
| $\alpha$ 1(I) collagen      | 2        | 5  | 5  | 5        | 6  | 4  | n.s | 2        | 3  | 0  | 0        | 2  | 0  | n.s | 6        | 6  | 3  | 4        | 6  | 6  | n.s       | n.s        | ↑**[2]   |
| $\alpha$ 1(XIV) collagen    | 5        | 10 | 7  | 4        | 11 | 0  | n.s | 0        | 6  | 7  | 4        | 14 | 0  | n.s | 0        | 0  | 0  | 0        | 4  | 0  | ↓*[1,2]   | ↑*[3]      | ↓**[1,2] |
| $\alpha$ 1(XI) collagen     | 7        | 5  | 7  | 6        | 4  | 5  | n.s | 7        | 8  | 8  | 8        | 6  | 7  | n.s | 5        | 5  | 7  | 3        | 4  | 7  | n.s       | ↓*[1]      | n.s      |
| $\alpha$ 1(IX) collagen     | 0        | 0  | 0  | 2        | 3  | 0  | ↑*  | 3        | 7  | 5  | 6        | 5  | 7  | n.s | 3        | 4  | 4  | 6        | 3  | 3  | n.s       | ↓*[1]↑*[3] | ↓**[1]   |
| $\alpha$ 2(I) collagen      | 6        | 0  | 2  | 5        | 2  | 3  | n.s | 0        | 0  | 4  | 0        | 0  | 0  | n.s | 4        | 5  | 4  | 6        | 7  | 4  | n.s       | n.s        | n.s      |
| Matrilin-1                  | 8        | 4  | 6  | 6        | 3  | 6  | n.s | 27       | 26 | 25 | 20       | 21 | 23 | n.s | 26       | 18 | 20 | 20       | 20 | 21 | n.s       | n.s        | n.s      |
| Matrilin-3                  | 4        | 5  | 4  | 3        | 4  | 4  | n.s | 13       | 11 | 7  | 9        | 9  | 6  | n.s | 10       | 7  | 6  | 9        | 13 | 11 | ↓***[2,3] | n.s        | n.s      |
| Matrilin-4                  | 0        | 0  | 0  | 0        | 0  | 0  | n.s | 3        | 4  | 9  | 8        | 5  | 3  | n.s | 3        | 3  | 3  | 3        | 6  | 0  | n.s       | n.s        | n.s      |
| Aggrecan                    | 14       | 7  | 10 | 17       | 9  | 8  | n.s | 8        | 8  | 12 | 9        | 11 | 12 | n.s | 25       | 19 | 25 | 18       | 18 | 19 | n.s       | n.s        | n.s      |
| Perlecan                    | 0        | 0  | 0  | 0        | 0  | 0  | n.s | 5        | 0  | 3  | 3        | 10 | 5  | n.s | 33       | 35 | 30 | 41       | 22 | 30 | n.s       | n.s        | n.s      |
| Vimentin                    | 13       | 14 | 23 | 17       | 13 | 19 | n.s | 4        | 2  | 8  | 3        | 4  | 5  | n.s | 25       | 22 | 23 | 21       | 19 | 21 | n.s       | ↑**[2]     | ↑***[2]  |
| Thrombospondin 1            | 9        | 7  | 7  | 8        | 8  | 5  | n.s | 19       | 20 | 22 | 19       | 16 | 18 | n.s | 15       | 19 | 11 | 15       | 19 | 9  | n.s       | n.s        | n.s      |
| COMP                        | 12       | 9  | 14 | 19       | 9  | 10 | n.s | 16       | 16 | 14 | 13       | 12 | 17 | n.s | 11       | 9  | 13 | 12       | 12 | 11 | n.s       | n.s        | n.s      |
| Fibronectin                 | 6        | 0  | 5  | 7        | 4  | 5  | n.s | 6        | 5  | 4  | 10       | 12 | 9  | ↑** | 20       | 21 | 24 | 24       | 30 | 22 | n.s       | ↓*[2]      | n.s      |
| Link protein                | 0        | 3  | 4  | 4        | 0  | 0  | n.s | 3        | 5  | 6  | 3        | 0  | 5  | n.s | 18       | 16 | 12 | 20       | 11 | 12 | n.s       | n.s        | n.s      |
| Fibromodulin                | 3        | 3  | 3  | 3        | 7  | 3  | n.s | 9        | 8  | 6  | 5        | 7  | 11 | n.s | 11       | 8  | 5  | 6        | 8  | 12 | n.s       | n.s        | n.s      |
| $\alpha$ -2-HS-glycoprotein | 5        | 0  | 4  | 4        | 3  | 5  | n.s | 11       | 12 | 14 | 13       | 9  | 13 | n.s | 11       | 7  | 5  | 8        | 8  | 10 | ↓*[3]     | ↓*[3]      | n.s      |
| Osteomodulin                | 0        | 0  | 0  | 0        | 2  | 2  | ↑*  | 5        | 3  | 0  | 2        | 4  | 6  | n.s | 5        | 3  | 3  | 7        | 6  | 5  | ↑*[1]     | n.s        | n.s      |
| Chondroadherin              | 4        | 5  | 4  | 7        | 4  | 4  | n.s | 5        | 8  | 7  | 3        | 7  | 7  | n.s | 12       | 9  | 6  | 9        | 6  | 9  |           | n.s        | n.s      |
| Biglycan                    | 2        | 0  | 2  | 2        | 2  | 0  | n.s | 3        | 3  | 4  | 2        | 6  | 8  | n.s | 15       | 18 | 13 | 11       | 11 | 12 | ↑*[1]     | n.s        | n.s      |

|             |   |   |   |   |   |   |     |    |    |    |    |    |   |     |    |    |    |   |    |    |        |     |        |
|-------------|---|---|---|---|---|---|-----|----|----|----|----|----|---|-----|----|----|----|---|----|----|--------|-----|--------|
| Osteonectin | 4 | 3 | 6 | 6 | 6 | 3 | n.s | 11 | 10 | 11 | 12 | 9  | 9 | n.s | 4  | 3  | 3  | 2 | 3  | 7  | n.s    | n.s | n.s    |
| Epiphygan   | 3 | 0 | 5 | 5 | 0 | 3 | n.s | 0  | 0  | 2  | 3  | 3  | 0 | n.s | 7  | 4  | 6  | 6 | 7  | 6  | ↓**[2] | n.s | ↓**[2] |
| Decorin     | 3 | 3 | 3 | 6 | 2 | 4 | n.s | 3  | 5  | 0  | 2  | 2  | 5 | n.s | 8  | 10 | 6  | 3 | 9  | 11 | ↓*[2]  | n.s | n.s    |
| Tenascin X  | 0 | 0 | 0 | 0 | 0 | 0 | n.s | 6  | 2  | 4  | 0  | 24 | 3 | n.s | 8  | 0  | 5  | 7 | 10 | 10 | n.s    | n.s | ↓**[3] |
| Tenascin C  | 0 | 0 | 0 | 0 | 0 | 0 | n.s | 0  | 0  | 0  | 0  | 0  | 0 | n.s | 5  | 4  | 9  | 9 | 8  | 7  | ↓**[3] | n.s | ↓**[3] |
| Lumican     | 4 | 4 | 6 | 6 | 7 | 4 | n.s | 4  | 6  | 3  | 5  | 3  | 4 | n.s | 3  | 4  | 2  | 4 | 7  | 3  | n.s    | n.s | n.s    |
| Nidogen-2   | 0 | 0 | 0 | 2 | 0 | 0 | n.s | 2  | 0  | 0  | 2  | 2  | 3 | n.s | 17 | 11 | 10 | 5 | 10 | 10 | n.s    | n.s | ↓*[3]  |

**Table S2. Extractability of extracellular matrix (ECM) proteins from the cartilage of wild-type and transgenic *Col2-Tg<sup>rdw</sup>* mice.**

Cartilage protein pools following extraction with buffers 1, 2 and 3 were analyzed by LC-MS/MS and the data evaluated using Mascot against the UniProt murine database and validated with Scaffold using peptide/protein confidence values of 0.95 and 0.99 respectively. Positively identified proteins were defined as those having a number of matched peptide spectra >2. Three biological replicates were used in all experiments and the number of matched spectra from each buffer/replicate is presented. For the composition of Buffer1, Buffer 2, and Buffer 3 please refer to the Materials and Methods section. Statistical significance was determined using the beta-binomial test: \*p<0.05; \*\*p<0.02; \*\*\*p<0.005. Key: WT = wild-type mice; RDW = *Col2-Tg<sup>rdw</sup>* mice; Δ = relative difference of RDW/WT; ↑ = increased extraction; ↓ = decreased extraction; n.s. = not significant. Significant differences in the cartilage protein extraction profiles of 3 targeted mouse models are also presented as a comparison (from Bell et al., 2013). V194D = *Matn3* V194D; T585M = *Comp* T585M; D469del = *Comp* D469del and the relevant extraction buffers are indicated in by square brackets.

**Table S3. The fold change in the relative expression levels of UPR, ERAD and cartilage-associated genes in *Col2-Tg<sup>rdw</sup>* mice compared to wild-type mice at 5 days of age.** RNA was isolated from the rib chondrocytes of 5 day old wild-type and *Col2-Tg<sup>rdw</sup>* mice. The relative expression levels of genes calculated using the Robust Multiarray Averaging (RMA) method are shown with the significance value given in parentheses. Highlighted in yellow are values that reach statistically significant difference compared to wild-type (i.e.  $P > 0.95$  for up regulated genes and  $P < 0.05$  for down regulated genes). The gene order and categorization of the genes is based on that published by Cameron et al., 2012.

**Canonical ER Stress Sensors**

| NCBI         | Gene Name                                                 | Gene Symbol | Synonyms           | Relative Expression RDW vs WT (PPLR Value) |
|--------------|-----------------------------------------------------------|-------------|--------------------|--------------------------------------------|
| NM_001081304 | Activating transcription factor 6                         | Atf6        | Atf6a              | -1.24 (0.311)                              |
| NM_023913    | Endoplasmic reticulum to nucleus signalling 1             | Ern1        | Ire1, Ire1a, Ire1p | 1.21 (0.436)                               |
| NM_010121    | Eukaryotic translation initiation factor 2 alpha kinase 3 | Eif2ak3     | Perk, Pek          | 2.44 (0.593)                               |

**Targets of Canonical ER Stress Sensors**

| NCBI         | Gene Name                                                            | Gene Symbol | Synonyms                                                              | Relative Expression RDW vs WT (PPLR Value) |
|--------------|----------------------------------------------------------------------|-------------|-----------------------------------------------------------------------|--------------------------------------------|
| <b>Atf6:</b> |                                                                      |             |                                                                       |                                            |
| NM_009722    | ATPase, Ca <sup>++</sup> transporting, cardiac muscle, slow twitch 2 | Atp2a2      | Serca2                                                                | -1.21 (0.462)                              |
| NM_007837    | DNA-damage inducible transcript 3                                    | Ddit3       | Chop, Chop10, Gadd153                                                 | -1.12 (0.284)                              |
| NM_022310    | Heat shock protein 5                                                 | Hspa5       | Bip, Grp78, Hsce70, Sez7                                              | -1.12 (0.324)                              |
| NM_027400    | Lectin, mannose-binding, 1                                           | Lman1       | Ergic53, F5f8d, gp58, Mcfd1, Mr60, P58                                | 1.18 (0.774)                               |
| NM_029103    | Mesencephalic astrocyte-derived neurotrophic factor                  | Manf        | Armet                                                                 | 1.02 (0.562)                               |
| NM_008725    | Natriuretic protein precursor type A                                 | Nppa        | Anp, Pnf, Pnd                                                         | 1.19 (0.626)                               |
| NM_011850    | Nuclear receptor subfamily 0, group b, member 2                      | Nr0b2       | Shp, Shp1                                                             | -5.67 (0.172)                              |
| NM_008814    | Pancreatic and duodenal homeobox 1                                   | Pdx1        | Idx1, lpf1, Mody4, Stf1                                               | -3.24 (0.267)                              |
| NM_028769    | Synovial apoptosis inhibitor 1 (Synoviolin)                          | Syvn1       | Hrd1                                                                  | 1.06 (0.611)                               |
| NM_020275    | Tumor necrosis factor receptor superfamily, member 10b               | Tnfrsf10b   | Dr5, Cd262, Killer, Trick2, Trickb, Ztnfr9, Trailr2, Trick2a, Trick2b | -1.24 (0.157)                              |
| NM_013842    | X-box binding protein 1                                              | Xbp1        | Treb5                                                                 | -1.05 (0.331)                              |

**Eif2ak3:**

|              |                                                             |        |                                                                                 |               |
|--------------|-------------------------------------------------------------|--------|---------------------------------------------------------------------------------|---------------|
| NM_007498    | Activating transcription factor 3                           | Atf3   | Lrg21                                                                           | -1.26 (0.040) |
| NM_007837    | DNA-damage inducible transcript 3                           | Ddit3  | Chop, Chop10, Gadd153                                                           | -1.12 (0.284) |
| NM_001005509 | Eukaryotic translation initiation factor 2a                 | Eif2a  |                                                                                 | -1.15 (0.227) |
| NM_026114    | Eukaryotic translation initiation factor 2, subunit 1 alpha | Eif2s1 | 35kDa                                                                           | -1.19 (0.186) |
| NM_023913    | Endoplasmic reticulum to nucleus signalling 1               | Ern1   | Ire1, Ire1a, Ire1p                                                              | 1.21 (0.436)  |
| NM_022310    | Heat shock protein 5                                        | Hspa5  | Bip, Grp78, Hsce70, Sez7                                                        | -1.12 (0.324) |
| NM_010481    | Heat shock protein 9                                        | Hspa9  | 74kDa, Csa, Grp75, Hsc74, Hsp74, Hsp74a, Hspa9a, Mortalin, Mot2, Nthso70, Pbp74 | -1.46 (0.129) |



|              |                                                                |          |                                                    |               |
|--------------|----------------------------------------------------------------|----------|----------------------------------------------------|---------------|
| NM_010512    | Insulin-like growth factor 1                                   | Igf1     |                                                    | 1.92 (0.976)  |
| NM_028782    | Ion peptidase 1, mitochondrial                                 | Lonp1    | Prss15                                             | 1.18 (0.695)  |
| NM_010902    | Nuclear factor, erythroid derived 2, like 2                    | Nfe2l2   | Nrf2                                               | -1.36 (0.172) |
| NM_008689    | Nuclear factor of light polypeptide gene enhancer in B-cells 1 | Nfkb1    | NF-kappaB, NF-kappaB1, NF-KB1, p105, p50, p50/p105 | -2.10 (0.000) |
| NM_019408    | Nuclear factor of light polypeptide gene enhancer in B-cells 2 | Nfkb2    | lyt, NF-kappaB2, p49, p49/p100, p50B, p52          | -1.55 (0.085) |
| NM_008654    | Protein phosphatase 1, regulatory (inhibitor) subunit 15a      | Ppp1r15a | Gadd34, Myd116                                     | -1.06 (0.300) |
| NM_001039521 | Rrn3 RNA polymerase I transcription factor homolog (yeast)     | Rrn3     | Tif1a                                              | -1.26 (0.059) |
| NM_011716    | Wolfram syndrome 1 homolog                                     | Wfs1     | Wolframin                                          | 1.00 (0.496)  |

#### Ern1:

|              |                                                                |           |                                                                        |               |
|--------------|----------------------------------------------------------------|-----------|------------------------------------------------------------------------|---------------|
| NM_001081304 | Activating transcription factor 6                              | Atf6      | Atf6a                                                                  | -1.24 (0.311) |
| NM_007837    | DNA-damage inducible transcript 3                              | Ddit3     | Chop, Chop10, Gadd153                                                  | -1.12 (0.284) |
| NM_022310    | Heat shock protein 5                                           | Hspa5     | Bip, Grp78, Hsce70, Sez7                                               | -1.12 (0.324) |
| NM_011952    | Mitogen-activated protein kinase 3                             | Mapk3     | Erk1, Esrk1, p44, p44erk1, p44mapk, Prkm3                              | 1.12 (0.714)  |
| NM_016700    | Mitogen-activated protein kinase 8                             | Mapk8     | Jnk, Jnk1, Prkm8, Sapk1                                                | -1.14 (0.259) |
| NM_008689    | Nuclear factor of light polypeptide gene enhancer in B-cells 1 | Nfkb1     | NF-kappaB, NF-kappaB1, NF-KB1, p105, p50, p50/p105                     | -2.10 (0.000) |
| NM_019408    | Nuclear factor of light polypeptide gene enhancer in B-cells 2 | Nfkb2     | lyt, NF-kappaB2, p49, p49/p100, p50B, p52                              | -1.55 (0.085) |
| NM_015760    | NADPH oxidase 4                                                | Nox4      |                                                                        | 1.00 (0.500)  |
| NM_011951    | Mitogen-activated protein kinase 14                            | Mapk14    | p38, Crk1, Mxi2, p38a, Csbp2, Csbp1, Prkm14, Prkm15, p38Mapk, p38alpha | 1.34 (0.563)  |
| NM_028769    | Synovial apoptosis inhibitor 1 (Synoviolin)                    | Syvn1     | Hrd1                                                                   | 1.06 (0.611)  |
| NM_013693    | Tumor necrosis factor                                          | Tnf       | Dif, Tnfa, Tnfsf2, Tnfsf1a, Tnfalpha                                   | -1.76 (0.127) |
| NM_020275    | Tumor necrosis factor receptor superfamily, member 10b         | Tnfrsf10b | Dr5, Cd262, Killer, Trick2, Trickb, Ztnfr9, Trailr2, Trick2a, Trick2b  | -1.24 (0.157) |
| NM_011716    | Wolfram syndrome 1 homolog                                     | Wfs1      | Wolframin                                                              | 1.00 (0.496)  |
| NM_013842    | X-box binding protein 1                                        | Xbp1      | Treb5                                                                  | -1.05 (0.331) |

#### Additional ER Stress Sensors

| NCBI      | Gene Name                                        | Gene Symbol | Synonyms        | Relative Expression RDW vs WT (PPLR Value) |
|-----------|--------------------------------------------------|-------------|-----------------|--------------------------------------------|
| NM_030080 | Androgen induced bZIP transcription factor       | Aibzip      | Creb3l4, Tisp40 | -1.24 (0.287)                              |
| NM_178661 | BBF2 human homolog on chromosome 7               | Bbf2h7      | Creb3l2         | -1.09 (0.228)                              |
| NM_145365 | cAMP responsive element binding protein 3-like 3 | Crebh       | Creb3l3         | -1.06 (0.471)                              |
| NM_013497 | cAMP responsive element binding 3                | Luman       | Creb3           | 1.30 (0.808)                               |
| NM_011957 | Old astrocyte specifically induced substance     | Oasis       | Creb3l1         | 1.12 (0.605)                               |

#### ERAD

| NCBI | Gene Name | Gene Symbol | Synonyms | Relative Expression RDW vs WT (PPLR Value) |
|------|-----------|-------------|----------|--------------------------------------------|
|------|-----------|-------------|----------|--------------------------------------------|

|              |                                                                                                |         |                            |               |
|--------------|------------------------------------------------------------------------------------------------|---------|----------------------------|---------------|
| NM_007597    | Calnexin                                                                                       | Canx    | Cnx                        | 1.00 (0.514)  |
| NM_007591    | Calreticulin                                                                                   | Calr    | Crt                        | -1.05 (0.373) |
| NM_024207    | Der1-like domain family, member 1 (Derlin 1)                                                   | Derl1   | Derlin-1                   | 1.11 (0.694)  |
| NM_033562    | Der1-like domain family, member 2 (Derlin 2)                                                   | Derl2   | Derlin-2                   | 1.37 (0.907)  |
| NM_024440    | Der1-like domain family, member 3 (Derlin 3)                                                   | Derl3   | Derlin-3                   | 1.49 (0.699)  |
| NM_010072    | Dolichol-phosphate (beta-D) mannosyltransferase 1                                              | Dpm1    |                            | -1.68 (0.190) |
| NM_010073    | Dolichol-phosphate (beta-D) mannosyltransferase 2                                              | Dpm2    |                            | 1.31 (0.989)  |
| NM_138677    | ER degradation enhancer, mannosidase alpha-like 1                                              | Edem1   |                            | -1.17 (0.543) |
| NM_145537    | ER degradation enhancer, mannosidase alpha-like 2                                              | Edem2   |                            | 1.09 (0.613)  |
| NM_001039644 | ER degradation enhancer, mannosidase alpha-like 3                                              | Edem3   |                            | -1.06 (0.385) |
| NM_022331    | Homocysteine-inducible, endoplasmic reticulum stress-inducible, ubiquitin-like domain member 1 | Herpud1 | Sup, Herp, Mifl            | -1.15 (0.168) |
| NM_020586    | HERPUD family member 2                                                                         | Herpud2 |                            | 1.25 (0.438)  |
| NM_007952    | Protein disulphide isomerase associated 3                                                      | Pdia3   | Erp57, Erp60, Erp61, Grp58 | 1.00 (0.445)  |
| NM_009787    | Protein disulphide isomerase associated 4                                                      | Pdia4   | Erp72, Cai                 | 1.10 (0.723)  |
| NM_028295    | Protein disulphide isomerase associated 5                                                      | Pdia5   | Pdir                       | 1.16 (0.748)  |
| NM_027959    | Protein disulphide isomerase associated 6                                                      | Pdia6   | CaBP5, p5                  | -1.19 (0.336) |
| NM_016906    | Sec61 alpha subunit 1                                                                          | Sec61a1 |                            | 1.06 (0.596)  |
| NM_021305    | Sec61 alpha subunit 2                                                                          | Sec61a2 |                            | -1.10 (0.286) |
| NM_008408    | STT3, subunit of the oligosaccharyltransferase complex, homolog A                              | Stt3a   | Itm1                       | 1.02 (0.541)  |
| NM_024222    | STT3, subunit of the oligosaccharyltransferase complex, homolog A                              | Stt3b   | Simp                       | 1.69 (0.803)  |
| NM_028769    | Synovial apoptosis inhibitor 1 (Synoviolin)                                                    | Syvn1   | Hrd1                       | 1.06 (0.611)  |

**Proteasomal subunits:**

| NCBI      | Gene Name                                             | Gene Symbol | Synonyms       | Relative Expression RDW vs WT (PPLR Value) |
|-----------|-------------------------------------------------------|-------------|----------------|--------------------------------------------|
| NM_011965 | Proteasome (prosome, macropain) subunit, alpha type 1 | Psma1       | C2, alpha-type | -1.26 (0.508)                              |
| NM_008944 | Proteasome (prosome, macropain) subunit, alpha type 2 | Psma2       | Lmpc3          | 1.12 (0.821)                               |
| NM_011184 | Proteasome (prosome, macropain) subunit, alpha type 3 | Psma3       | Lmpc8          | 1.04 (0.579)                               |
| NM_011966 | Proteasome (prosome, macropain) subunit, alpha type 4 | Psma4       | C9             | 1.18 (0.993)                               |
| NM_011967 | Proteasome (prosome, macropain) subunit, alpha type 5 | Psma5       | Zeta           | 1.16 (0.804)                               |
| NM_011968 | Proteasome (prosome, macropain) subunit, alpha type 6 | Psma6       | Iota           | 1.07 (0.621)                               |
| NM_011969 | Proteasome (prosome, macropain) subunit, alpha type 7 | Psma7       | C6-I           | 1.42 (0.964)                               |
| AK010717  | Proteasome (prosome, macropain) subunit, alpha type 8 | Psma8       |                | -1.32 (0.256)                              |

|           |                                                            |        |                         |               |
|-----------|------------------------------------------------------------|--------|-------------------------|---------------|
| NM_011185 | Proteasome (prosome, macropain) subunit, beta type 1       | Psmb1  | Lmpc5                   | -1.02 (0.500) |
| NM_011970 | Proteasome (prosome, macropain) subunit, beta type 2       | Psmb2  | C7-I                    | 1.17 (0.861)  |
| NM_011971 | Proteasome (prosome, macropain) subunit, beta type 3       | Psmb3  | C10-II                  | 1.12 (0.788)  |
| NM_008945 | Proteasome (prosome, macropain) subunit, beta type 4       | Psmb4  |                         | 1.07 (0.672)  |
| NM_011186 | Proteasome (prosome, macropain) subunit, beta type 5       | Psmb5  |                         | 1.25 (0.915)  |
| NM_008946 | Proteasome (prosome, macropain) subunit, beta type 6       | Psmb6  | Mpnd, Lmp19             | 1.11 (0.800)  |
| NM_011187 | Proteasome (prosome, macropain) subunit, beta type 7       | Psmb7  | MC14                    | 1.25 (0.829)  |
| NM_010724 | Proteasome (prosome, macropain) subunit, beta type 8       | Psmb8  | Lmp7                    | -1.11 (0.484) |
| NM_013585 | Proteasome (prosome, macropain) subunit, beta type 9       | Psmb9  | Lmp2                    | -1.39 (0.433) |
| NM_013640 | Proteasome (prosome, macropain) subunit, beta type 10      | Psmb10 | Mecl1                   | 1.53 (0.670)  |
| NM_008947 | Protease (prosome, macropain) 26S subunit, ATPase 1        | Psmc1  | S4, P26s4               | 1.16 (0.837)  |
| NM_011188 | Protease (prosome, macropain) 26S subunit, ATPase 2        | Psmc2  |                         | 1.01 (0.519)  |
| NM_008948 | Protease (prosome, macropain) 26S subunit, ATPase 3        | Psmc3  | Tbp1                    | 1.09 (0.689)  |
| NM_011874 | Protease (prosome, macropain) 26S subunit, ATPase 4        | Psmc4  | Cip21, Mip224           | 1.10 (0.684)  |
| NM_008950 | Protease (prosome, macropain) 26S subunit, ATPase 5        | Psmc5  | mSUG1                   | 1.12 (0.696)  |
| NM_025959 | Protease (prosome, macropain) 26S subunit, ATPase 6        | Psmc6  |                         | -1.19 (0.140) |
| NM_027357 | Proteasome (prosome, macropain) 26S subunit, non-ATPase, 1 | Psmc1  | S1, P112                | -1.13 (0.365) |
| NM_134101 | Proteasome (prosome, macropain) 26S subunit, non-ATPase, 2 | Psmc2  | Tex190, Teg190          | 1.20 (0.594)  |
| NM_009439 | Proteasome (prosome, macropain) 26S subunit, non-ATPase, 3 | Psmc3  | Psd3, AntP91a, Tstap91a | 1.02 (0.522)  |
| NM_008951 | Proteasome (prosome, macropain) 26S subunit, non-ATPase, 4 | Psmc4  | Af1, Mcb1               | 1.04 (0.546)  |
| NM_080554 | Proteasome (prosome, macropain) 26S subunit, non-ATPase, 5 | Psmc5  | S5b                     | 1.29 (0.724)  |
| NM_025550 | Proteasome (prosome, macropain) 26S subunit, non-ATPase, 6 | Psmc6  |                         | 1.11 (0.685)  |
| NM_010817 | Proteasome (prosome, macropain) 26S subunit, non-ATPase, 7 | Psmc7  | Mov34                   | 1.32 (0.687)  |
| NM_026545 | Proteasome (prosome, macropain) 26S subunit, non-ATPase, 8 | Psmc8  |                         | -1.02 (0.436) |
| NM_026000 | Proteasome (prosome, macropain) 26S subunit,               | Psmc9  | P27, Bridge-I           | 1.58 (0.708)  |

|           |                                                             |       |                     |               |
|-----------|-------------------------------------------------------------|-------|---------------------|---------------|
|           | non-ATPase, 9                                               |       |                     |               |
| NM_016883 | Proteasome (prosome, macropain) 26S subunit, non-ATPase, 10 | Psm10 |                     | 1.31 (0.932)  |
| NM_178616 | Proteasome (prosome, macropain) 26S subunit, non-ATPase, 11 | Psm11 | S9                  | -1.28 (0.326) |
| NM_025894 | Proteasome (prosome, macropain) 26S subunit, non-ATPase, 12 | Psm12 | P55                 | -1.07 (0.264) |
| NM_011875 | Proteasome (prosome, macropain) 26S subunit, non-ATPase, 13 | Psm13 | S11                 | 1.34 (0.798)  |
| NM_021526 | Proteasome (prosome, macropain) 26S subunit, non-ATPase, 14 | Psm14 | Pad1, Poh1, rpm11   | 1.04 (0.662)  |
| NM_011189 | Proteasome (prosome, macropain) 28S subunit, alpha          | Psm1  | PA28a               | 1.01 (0.513)  |
| NM_011192 | Proteasome (prosome, macropain) 28S subunit, 3              | Psm3  | Ki, REGgamma, pa28g | 1.07 (0.414)  |
| NM_134013 | Proteasome (prosome, macropain) 28S subunit, 4              | Psm4  | TEMO                | -1.24 (0.231) |
| NM_212446 | Proteasome (prosome, macropain) inhibitor subunit 1         | Psmf1 | PI31                | 1.11 (0.690)  |

**Molecular Chaperones:**

| NCBI         | Gene Name                                    | Gene Symbol      | Synonyms                                  | Relative Expression RDW vs WT (PPLR Value) |
|--------------|----------------------------------------------|------------------|-------------------------------------------|--------------------------------------------|
| NM_008298    | DnaJ (Hsp40) homolog, subfamily A, member 1  | Dnaja1           | Hsj2, Nedd7                               | 1.06 (0.650)                               |
| NM_019794    | DnaJ (Hsp40) homolog, subfamily A, member 2  | Dnaja2           | Dnaj, Dnj3, mDj3, Dnaj3, Hirip4           | -1.25 (0.124)                              |
| NM_023646    | DnaJ (Hsp40) homolog, subfamily A, member 3  | Dnaja3           | Tid1, Tid11                               | 1.78 (0.103)                               |
| NM_021422    | DnaJ (Hsp40) homolog, subfamily A, member 4  | Dnaja4           | Dj4, Hsj4                                 | -1.15 (0.316)                              |
| NM_018808    | DnaJ (Hsp40) homolog, subfamily B, member 1  | Dnajb1           | Hspf1, Hsp40                              | -1.21 (0.143)                              |
| NM_008299    | DnaJ (Hsp40) homolog, subfamily B, member 3  | Dnajb3           | Hsj3, Msj1                                | 1.02 (0.519)                               |
| NM_025926    | DnaJ (Hsp40) homolog, subfamily B, member 4  | Dnajb4           |                                           | 1.01 (0.563)                               |
| NM_019874    | DnaJ (Hsp40) homolog, subfamily B, member 5  | Dnajb5           | Hsc40, Hsp40-3                            | 1.48 (0.510)                               |
| NM_001037940 | DnaJ (Hsp40) homolog, subfamily B, member 6  | Dnajb6           | Mrj, mDj4                                 | -1.01 (0.392)                              |
| NM_021317    | DnaJ (Hsp40) homolog, subfamily B, member 7  | Dnajb7           | Dj5, mDj5                                 | 1.67 (0.618)                               |
| NM_019964    | DnaJ (Hsp40) homolog, subfamily B, member 8  | Dnajb8           | mDj6                                      | -1.13 (0.448)                              |
| NM_013760    | DnaJ (Hsp40) homolog, subfamily B, member 9  | Dnajb9           | Mdg1, mDj7, ERdj4                         | -1.12 (0.287)                              |
| NM_020266    | DnaJ (Hsp40) homolog, subfamily B, member 10 | Dnajb10          | Hsj1, mDj8, Dnajb2                        | -1.19 (0.094)                              |
| NM_026400    | DnaJ (Hsp40) homolog, subfamily B, member 11 | Dnajb11          | Dj9, Abbp2                                | 1.07 (0.657)                               |
| NM_019965    | DnaJ (Hsp40) homolog, subfamily B, member 12 | Dnajb12          | Dj10, mDj10                               | 1.38 (0.908)                               |
| NM_153527    | DnaJ (Hsp40) related, subfamily B, member 13 | Dnajb13          | Tsarg                                     | -1.33 (0.345)                              |
| NM_007869    | DnaJ (Hsp40) homolog, subfamily C, member 1  | Dnajc1           | MTJ1, ERdj1, ERj1p, Dnajl1                | -1.11 (0.313)                              |
| NM_009584    | DnaJ (Hsp40) homolog, subfamily C, member 2  | Dnajc2           | Zrf1, Zrf2, MIDA1                         | -1.47 (0.471)                              |
| NM_008929    | DnaJ (Hsp40) homolog, subfamily C, member 3B | Dnajc3a (p58IPK) | p58, mp58, Prkri, p58IPK, Dnajc3, Dnajc3b | -1.09 (0.352)                              |
| NM_020566    | DnaJ (Hsp40) homolog,                        | Dnajc4           | Hspf2, Mcg18                              | 1.19 (0.707)                               |



|              |                                                      |         |                                                                                 |               |
|--------------|------------------------------------------------------|---------|---------------------------------------------------------------------------------|---------------|
|              | subfamily C, member 4                                |         |                                                                                 |               |
| NM_016775    | DnaJ (Hsp40) homolog, subfamily C, member 5          | Dnajc5  | Csp                                                                             | -1.09 (0.340) |
| NM_025489    | DnaJ (Hsp40) homolog, subfamily C, member 5 beta     | Dnajc5b |                                                                                 | 2.00 (0.800)  |
| NM_177677    | DnaJ (Hsp40) homolog, subfamily C, member 5 gamma    | Dnajc5g |                                                                                 | 1.12 (0.535)  |
| NM_198412    | DnaJ (Hsp40) homolog, subfamily C, member 6          | Dnajc6  |                                                                                 | 1.01 (0.601)  |
| NM_019795    | DnaJ (Hsp40) homolog, subfamily C, member 7          | Dnajc7  | Ttc2, mDj11, mTpr2                                                              | 1.10 (0.716)  |
| NM_172400    | DnaJ (Hsp40) homolog, subfamily C, member 8          | Dnajc8  |                                                                                 | -1.05 (0.470) |
| NM_134081    | DnaJ (Hsp40) homolog, subfamily C, member 9          | Dnajc9  |                                                                                 | 1.39 (1.000)  |
| NM_024181    | DnaJ (Hsp40) homolog, subfamily C, member 10         | Dnajc10 | JPDI, ERdj5                                                                     | 1.01 (0.483)  |
| NM_172704    | DnaJ (Hsp40) homolog, subfamily C, member 11         | Dnajc11 |                                                                                 | 1.21 (0.535)  |
| NM_013888    | DnaJ (Hsp40) homolog, subfamily C, member 12         | Dnajc12 | Jdp1, mJDP1                                                                     | 1.00 (0.505)  |
| NM_001163026 | DnaJ (Hsp40) homolog, subfamily C, member 13         | Dnajc13 | Rme8, RME-8, Gm1124                                                             | 1.41 (0.215)  |
| NM_028873    | DnaJ (Hsp40) homolog, subfamily C, member 14         | Dnajc14 | Dnaj, Hdj3, Lip6, Drip78                                                        | 1.32 (0.814)  |
| NM_025384    | DnaJ (Hsp40) homolog, subfamily C, member 15         | Dnajc15 | Dnajd1                                                                          | 1.32 (0.997)  |
| NM_172338    | DnaJ (Hsp40) homolog, subfamily C, member 16         | Dnajc16 |                                                                                 | 1.64 (0.575)  |
| NM_139139    | DnaJ (Hsp40) homolog, subfamily C, member 17         | Dnajc17 |                                                                                 | -1.11 (0.418) |
| NM_029669    | DnaJ (Hsp40) homolog, subfamily C, member 18         | Dnajc18 |                                                                                 | 1.00 (0.594)  |
| NM_026332    | DnaJ (Hsp40) homolog, subfamily C, member 19         | Dnajc19 | Tim14                                                                           | 1.24 (0.783)  |
| NM_010479    | Heat shock protein 1A                                | Hspa1a  | Hsp72, hsp68, Hsp70-3, Hsp70.3, hsp70A1                                         | -1.10 (0.304) |
| NM_013558    | Heat shock protein 1-like                            | Hspa1l  | Msh5, Hsc70t                                                                    | 1.40 (0.670)  |
| NM_008301    | Heat shock protein 2                                 | Hspa2   | 70kDa, Hsp70.2, Hsp70a2, Hsp70-2                                                | -1.02 (0.406) |
| NM_008300    | Heat shock protein 4                                 | Hspa4   | 70kDa, Apg-2, Hsp110, Hsp70RY                                                   | 1.09 (0.396)  |
| NM_011020    | Heat shock protein 4 like                            | Hspa4l  | 94kDa, Apg-1, Osp94                                                             | 1.19 (0.365)  |
| NM_022310    | Heat shock protein 5                                 | Hspa5   | Bip, Grp78, Hsce70, Sez7                                                        | -1.12 (0.324) |
| NM_031165    | Heat shock protein 8                                 | Hspa8   | Hsc70, Hsc71, Hsc73, Hsp73, Hspa10                                              | -1.20 (0.266) |
| NM_010481    | Heat shock protein 9                                 | Hspa9   | 74kDa, Csa, Grp75, Hsc74, Hsp74, Hsp74a, Hspa9a, Mortalin, Mot2, Nthso70, Pbp74 | -1.46 (0.129) |
| NM_175199    | Heat shock protein 12A                               | Hspa12a | D5Mgi40                                                                         | 1.37 (0.488)  |
| NM_028306    | Heat shock protein 12B                               | Hspa12b |                                                                                 | 2.05 (0.682)  |
| NM_015765    | Heat shock protein 14                                | Hspa14  | 70kDa, NST-1, HSP70L1, Hsp70-4                                                  | -1.13 (0.401) |
| NM_013560    | Heat shock protein 1                                 | Hspb1   | 27kDa, Hsp25                                                                    | -1.14 (0.190) |
| NM_024441    | Heat shock protein 2                                 | Hspb2   | Mkbp, 27kDa, Hsp27                                                              | 2.03 (0.884)  |
| NM_019960    | Heat shock protein 3                                 | Hspb3   | spb3, Hsbp3                                                                     | -1.72 (0.258) |
| NM_001012401 | Heat shock protein, alpha-crystallin-related, B6     | Hspb6   | Gm479, Hsp20                                                                    | -1.28 (0.053) |
| NM_013868    | Heat shock protein family, member 7 (cardiovascular) | Hspb7   | 27kDa, cvHsp, Hsp25-2                                                           | -1.72 (0.293) |
| NM_030704    | Heat shock protein 8 (Hspb8)                         | Hspb8   | H11, H11K, Cryac, E2ig1, Hsp22, D5ucla4, Hsp20-like                             | 1.35 (0.623)  |
| NM_175111    | Hspb associated protein 1                            | Hspbap1 |                                                                                 | -1.14 (0.481) |
| NM_025486    | Heat shock protein c171                              | Hspc171 | Tmem208                                                                         | 1.42 (0.992)  |
| NM_010477    | Heat shock protein 1 (chaperonin)                    | Hspd1   | 60kDa, Hsp60                                                                    | -1.04 (0.363) |

|           |                                                              |                 |                                                  |               |
|-----------|--------------------------------------------------------------|-----------------|--------------------------------------------------|---------------|
| NM_010480 | Heat shock protein 90kDa alpha (cytosolic), class A member 1 | Hsp90aa1        | Hsp4, 86kDa, 89kDa, Hsp89, Hsp90, Hspca, Hsp86-1 | -1.10 (0.344) |
| NM_008302 | Heat shock protein 90kDa alpha (cytosolic), class B member 1 | Hsp90ab1        | 90kDa, Hsp84, Hsp90, Hspcb                       | -1.11 (0.213) |
| NM_011631 | Heat shock protein 90kDa beta (Grp94), member 1              | Hsp90b1 (Grp94) | TA-3, Tra1, gp96, ERp99, Grp94, Targ2, Tra-1     | -1.22 (0.086) |
| NM_013559 | Heat shock protein 110                                       | Hsp110          | 105kDa, Hsp105, hsp-E71, Hsph1                   | -1.15 (0.186) |

**Cartilage markers:**

| NCBI      | Gene Name                                                          | Gene Symbol | Synonyms                   | Relative Expression RDW vs WT (PPLR Value) |
|-----------|--------------------------------------------------------------------|-------------|----------------------------|--------------------------------------------|
| NM_007424 | Aggrecan                                                           | Aqc1        | Aqc, cmd, Cspg1, Acan      | -1.01 (0.462)                              |
| NM_007614 | Catenin (cadherin associated protein), beta 1                      | Ctnnb1      | Mesc, Catnb                | -1.08 (0.338)                              |
| NM_031163 | Collagen, type II, alpha 1                                         | Col2a1      |                            | -1.23 (0.154)                              |
| NM_009933 | Collagen, type VI, alpha 1                                         | Col6a1      |                            | -1.03 (0.399)                              |
| NM_146007 | Collagen, type VI, alpha 2                                         | Col6a2      |                            | -1.04 (0.414)                              |
| XM_897036 | Collagen, type VI, alpha 3                                         | Col6a3      |                            | -1.17 (0.074)                              |
| NM_007739 | Collagen, type VIII, alpha 1                                       | Col8a1      |                            | -1.06 (0.428)                              |
| NM_199473 | Collagen, type VIII, alpha 2                                       | Col8a2      |                            | 1.01 (0.545)                               |
| NM_007740 | Collagen, type IX, alpha 1                                         | Col9a1      |                            | -1.15 (0.232)                              |
| NM_007741 | Collagen, type IX, alpha 2                                         | Col9a2      |                            | 1.02 (0.555)                               |
| NM_009936 | Collagen, type IX, alpha 3                                         | Col9a3      |                            | 1.00 (0.318)                               |
| NM_007729 | Collagen, type XI, alpha 1                                         | Col11a1     |                            | -1.09 (0.306)                              |
| NM_009926 | Collagen, type XI, alpha 2                                         | Col11a2     |                            | -1.05 (0.354)                              |
| NM_016685 | Cartilage oligomeric matrix protein                                | Comp        | Tsp5                       | -1.18 (0.162)                              |
| NM_010217 | Connective tissue growth factor                                    | Ctgf        | Ccn2, Hcs24, Fisp12        | -1.01 (0.464)                              |
| NM_010056 | Distal-less homeobox 5                                             | Dlx5        |                            | 1.63 (0.901)                               |
| NM_008005 | Fibroblast growth factor 18                                        | Fgf18       |                            | -1.13 (0.335)                              |
| NM_008010 | Fibroblast growth factor receptor 3                                | Fgfr3       | Hbgfr                      | -1.19 (0.247)                              |
| NM_013500 | Hyaluronan and proteoglycan link protein 1                         | Hapln1      | Lp, Clp, Crt11, Crt11l     | -1.01 (0.518)                              |
| NM_010544 | Indian hedgehog                                                    | Ihh         |                            | 5.00 (0.930)                               |
| NM_010769 | Matrilin 1                                                         | Matn1       | Cmp, Crtm, Mat1            | -1.51 (0.000)                              |
| NM_016762 | Matrilin 2                                                         | Matn2       | Crtm2                      | 1.71 (0.608)                               |
| NM_010770 | Matrilin 3                                                         | Matn3       |                            | -1.22 (0.234)                              |
| NM_013592 | Matrilin 4                                                         | Matn4       |                            | 1.09 (0.746)                               |
| NM_008970 | Parathyroid hormone-like peptide                                   | Pthlh       | Pthrp                      | 1.21 (0.634)                               |
| NM_011199 | Parathyroid hormone 1 receptor                                     | Pthr1       | Ppr, Pthr, Pth1r           | 1.34 (0.946)                               |
| NM_022017 | Transient receptor potential cation channel, subfamily V, member 4 | Trpv4       | Trp12, Vrl2, Vroac, Otrpc4 | -1.08 (0.347)                              |

**Hypertrophic cartilage markers:**

|           |                                         |         |                                                        |               |
|-----------|-----------------------------------------|---------|--------------------------------------------------------|---------------|
| NM_007431 | Alkaline phosphatase, liver/bone/kidney | Akp2    | Tnap, Tnsalp, Alpl                                     | 1.55 (0.776)  |
| NM_009925 | Collagen, type X, alpha 1               | Col10a1 |                                                        | -1.61 (0.000) |
| NM_013599 | Matrix metalloproteinase 9              | Mmp9    | Clg4b                                                  | -1.58 (0.146) |
| NM_008607 | Matrix metalloproteinase 13             | Mmp13   | Clg, Mmp1                                              | -1.35 (0.001) |
| NM_008608 | Matrix metalloproteinase 14             | Mmp14   | Mt1mmp                                                 | 1.44 (0.901)  |
| NM_009263 | Secreted phosphoprotein 1               | Spp1    | Op, Bsp, Eta, Opn, Ric, Bnsp, Bspl, Opnl, Apl1         | -1.10 (0.337) |
| NM_009820 | Runt related transcription factor 2     | Runx2   | Cbf, Ls3, Aml3, Osf2, Cbfa1, Pebp2aa, Pebp2a1, Pebpa2a | 1.17 (0.516)  |

**Apoptosis:**

| NCBI      | Gene Name                                                                      | Gene Symbol | Synonyms                                           | Relative Expression RDW vs WT (PPLR Value) |
|-----------|--------------------------------------------------------------------------------|-------------|----------------------------------------------------|--------------------------------------------|
| NM_007527 | Bcl2-associated X protein                                                      | Bax         |                                                    | 1.26 (0.926)                               |
| NM_009741 | B-cell leukemia/lymphoma 2                                                     | Bcl2        | Bcl-2                                              | -1.21 (0.376)                              |
| NM_009808 | Caspase 12                                                                     | Casp12      |                                                    | 1.57 (0.707)                               |
| NM_009810 | Caspase 3                                                                      | Casp3       | Cc3, Lice, Yama, Mldy, Cpp32, Apopain, Caspase-3   | 1.37 (0.666)                               |
| NM_007611 | Caspase 7                                                                      | Casp7       | Mch3, Cmh-1, mCasp-7, lce-lap3, Caspase-7          | -1.74 (0.387)                              |
| NM_015733 | Caspase 9                                                                      | Casp9       | Mch6, lce-Lap6, Caspase-9                          | -1.36 (0.563)                              |
| NM_007837 | DNA damage inducible transcript 3                                              | Ddit3       | Chop, Chop10, Chop-10, Gadd153, Ddit3              | -1.12 (0.284)                              |
| NM_015774 | ERO1-like (S. cerevisiae)                                                      | Ero1l       |                                                    | 1.00 (0.539)                               |
| NM_026184 | ERO1-like beta (S. cerevisiae)                                                 | Ero1lb      | Ero1-beta                                          | -1.14 (0.490)                              |
| NM_146120 | Gelsolin                                                                       | Gsn         |                                                    | -1.10 (0.201)                              |
| NM_010705 | Lectin, galactose binding, soluble 3                                           | Lgals3      | Gbp, L-34, Gal3, Mac-2                             | -1.27 (0.123)                              |
| NM_008580 | Mitogen-activated protein kinase kinase kinase 5                               | Map3k5      | Ask, Ask1, Mekk5, Mapkkk5                          | -1.59 (0.019)                              |
| NM_016700 | Mitogen-activated protein kinase 8                                             | Mapk8       | Jnk, Jnk1, Prkm8, Sapk1                            | -1.14 (0.259)                              |
| NM_008689 | Nuclear factor of kappa light polypeptide gene enhancer in B-cells 1, p105     | Nfkb1       | p50, p105, Nf-kb1, p50/p105, Nf-kappaB, Nf-kappaB1 | -2.01 (0.000)                              |
| NM_019408 | Nuclear factor of kappa light polypeptide gene enhancer in B-cells 2, p49/p100 | Nfkb2       | Lyt, p49, p52, p50B, p49/p100, Nf-kappaB2          | -1.55 (0.085)                              |
| NM_008654 | Protein phosphatase 1, regulatory (inhibitor) subunit 15A                      | Ppp1r15a    | Gadd34, Myd116                                     | -1.06 (0.300)                              |
| NM_009422 | TNF receptor-associated factor 2                                               | Traf2       |                                                    | -1.20 (0.290)                              |
| NM_175093 | Tribbles homolog 3 (Drosophila)                                                | Trib3       | Nipk, Sink, Trb3, Ifld2, Skip3, Trb-3              | -1.62 (0.030)                              |
| NM_207680 | Bcl2-like 11 (apoptosis facilitator)                                           | Bcl2l11     | Bim, Bod                                           | -1.59 (0.099)                              |
| NM_133234 | Bcl2 binding component 3                                                       | Bbc3        | Puma, Puma/Jfy1                                    | -1.14 (0.363)                              |
| NM_026929 | Chac, cation transport-like regulator 1 (E.coli)                               | Chac1       |                                                    | -1.33 (0.022)                              |
| NM_019816 | Apoptosis antagonizing transcription factor                                    | Aatf        | Trb, Che-1                                         | 1.09 (0.640)                               |
| NM_213659 | Signal transducer and activator of transcription 3                             | Stat3       | Aprf                                               | 1.69 (0.450)                               |
| NM_011716 | Wolfram syndrome 1 homolog (human)                                             | Wfs1        | Wolframin                                          | 1.00 (0.496)                               |
| NM_009652 | Thymoma viral proto-oncogene 1                                                 | Akt1        | Akt; PKB; Rac; PKB/Akt; PKBalpha; Akt1             | 1.00 (0.525)                               |
